# Supplementary material for: Electronic influence of ultrathin aluminum oxide on the transistor device performance of binary indium/tin oxide films
Source: Royal Society of Chemistry journal article supplement (doi:10.1039/d2tc00285j), 2022-01-01
Supplement: d2tc00285j1.pdf [file d2tc00285j1.pdf]

## Supplementary Information

### Electronic influence of ultrathin aluminum oxide on the transistor device performance of binary indium/tin oxide films.

M. Isabelle Büschges,<sup>a</sup> Vanessa Trouillet,<sup>b</sup> Jörg J. Schneider\*<sup>a</sup>

**Table S1** Binding energies of the core levels Al 2*p*, Sn 3*d*, In 3*d* and O 1*s* for the thin-films ITAO 1-3.

|                                                                                              | ITAO 1  | ITAO 2  | ITAO 3  |
|----------------------------------------------------------------------------------------------|---------|---------|---------|
|                                                                                              | BE [eV] | BE [eV] | BE [eV] |
| Al 2 <i>p</i> <sub>3/2</sub>                                                                 | 73.8    | 73.9    | 74.0    |
| Al 2 <i>p</i> <sub>1/2</sub>                                                                 | 74.4    | 74.5    | 74.6    |
| Sn 3 <i>d</i> <sub>5/2</sub>                                                                 | 486.6   | 486.6   | 486.8   |
| In 3 <i>d</i> <sub>5/2</sub>                                                                 | 444.5   | 444.5   | 444.5   |
| O 1 <i>s</i> M <sub>x</sub> -O <sub>y</sub> In <sub>2</sub> O <sub>3</sub> /SnO <sub>2</sub> | 530.1   | 530.1   | 530.1   |
| O 1 <i>s</i> M <sub>x</sub> -O <sub>y</sub> Al <sub>2</sub> O <sub>3</sub>                   | 531.7   | 531.5   | 531.2   |
| O 1 <i>s</i> M-OH                                                                            | 532.7   | 532.6   | 532.5   |

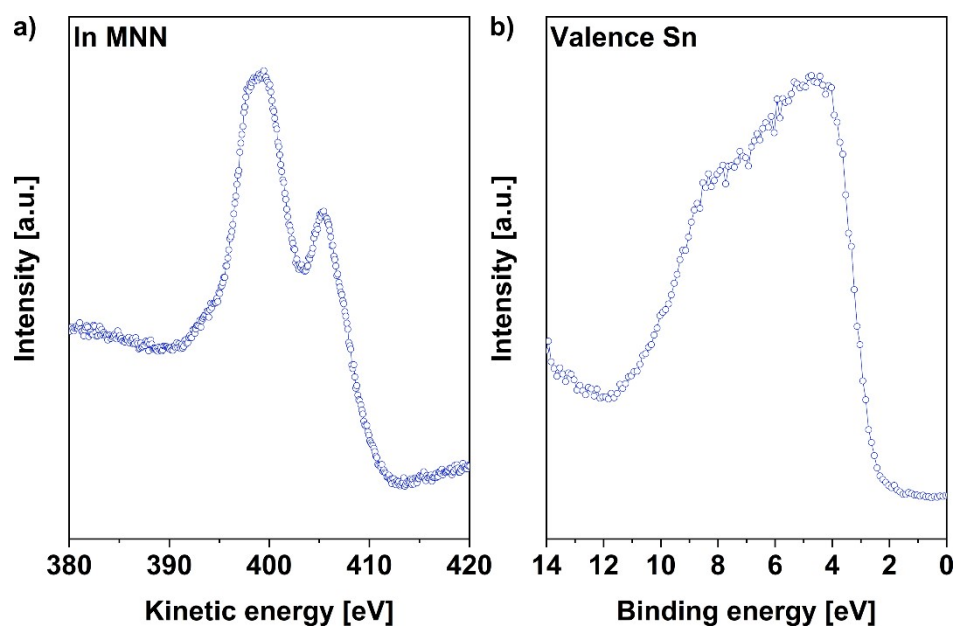

**Fig. S1** Auger lines of In and valence band of Sn for the heterostructure ITAO 2.

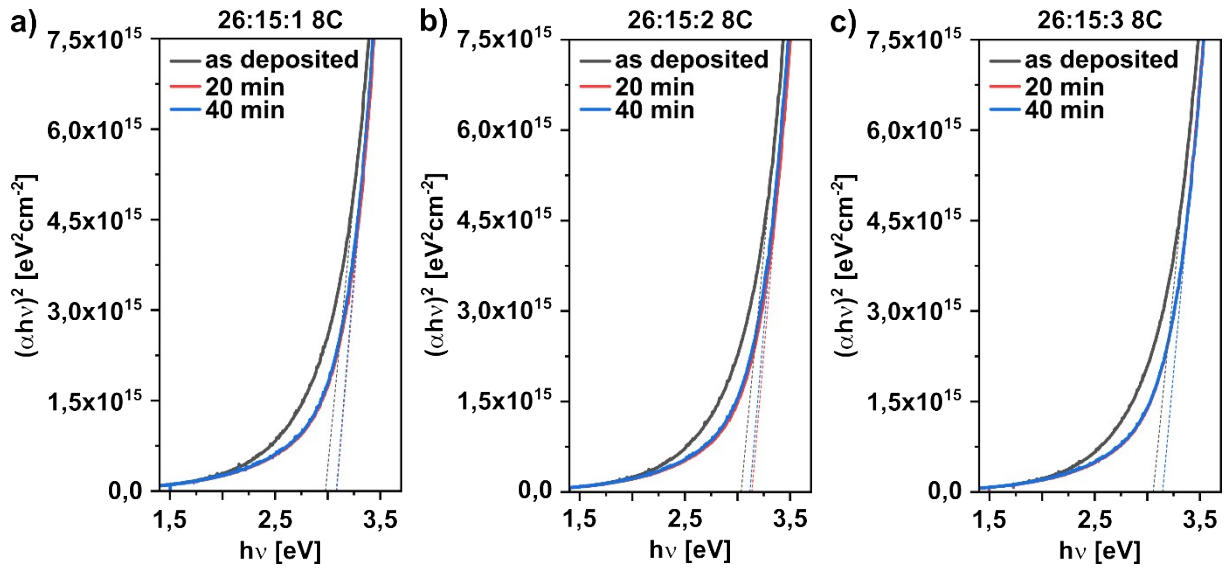

**Fig. S2** Tauc plots for the thin-films a) 26:15:1, b) 26:15:2, and c) 26:15:3 as-deposited, annealed for 20 min and 40 min at 400°C.

**Table S2** Calculated band gaps depending on post-deposition annealing time and corresponding film thickness.

| Composition<br>$\text{In}_2\text{O}_3/\text{SnO}_2/\text{Al}_2\text{O}_3$ | Eg [eV]      |               |               | Film thickness [nm] |               |               |
|---------------------------------------------------------------------------|--------------|---------------|---------------|---------------------|---------------|---------------|
|                                                                           | As deposited | 20 Min @400°C | 40 Min @400°C | As deposited        | 20 Min @400°C | 40 Min @400°C |
| 26:15:1                                                                   | 2.98         | 3.09          | 3.08          | 12.91               | 12.53         | 12.52         |
| 26:15:2                                                                   | 3.04         | 3.14          | 3.12          | 14.56               | 14.06         | 14.06         |
| 26:15:3                                                                   | 3.06         | 3.15          | 3.15          | 15.80               | 15.33         | 15.30         |

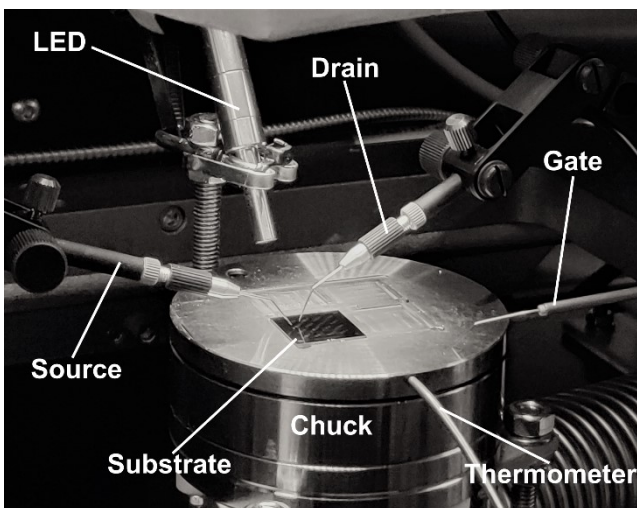

**Fig. S3** Measuring setup consisting of a temperature controllable chuck, equipped with thermometer. Source, drain, and gate probes, as well as the LED fixture for the illumination experiments is shown.

**Table S3** Dependence of the transistor parameters  $V_{on}$  and  $I_{off}$  on the illumination energies ranging from 2.0 to 3.7 eV.

| Energy [eV] | 26:15:1      |                      | 26:15:2      |                      | 26:15:3      |                      |
|-------------|--------------|----------------------|--------------|----------------------|--------------|----------------------|
|             | $V_{on}$ [V] | $I_{off}$ [A]        | $V_{on}$ [V] | $I_{off}$ [A]        | $V_{on}$ [V] | $I_{off}$ [A]        |
| Dark        | -5.4         | $1.14 \cdot 10^{-6}$ | -1.7         | $5.48 \cdot 10^{-8}$ | -1.1         | $3.27 \cdot 10^{-9}$ |
| 2.0         | -5.7         | $1.18 \cdot 10^{-6}$ | -1.8         | $5.63 \cdot 10^{-8}$ | -1.1         | $3.49 \cdot 10^{-9}$ |
| 2.3         | -6.0         | $1.21 \cdot 10^{-6}$ | -2.0         | $5.76 \cdot 10^{-8}$ | -1.1         | $3.56 \cdot 10^{-9}$ |
| 2.6         | -6.0         | $1.24 \cdot 10^{-6}$ | -2.2         | $5.92 \cdot 10^{-8}$ | -1.2         | $3.68 \cdot 10^{-9}$ |
| 3.1         | -6.6         | $1.29 \cdot 10^{-6}$ | -2.5         | $6.19 \cdot 10^{-8}$ | -1.6         | $3.89 \cdot 10^{-9}$ |
| 3.2         | -7.1         | $1.34 \cdot 10^{-6}$ | -3.0         | $6.55 \cdot 10^{-8}$ | -1.9         | $4.18 \cdot 10^{-9}$ |
| 3.4         | -7.2         | $1.41 \cdot 10^{-6}$ | -3.4         | $7.07 \cdot 10^{-8}$ | -2.4         | $4.60 \cdot 10^{-9}$ |
| 3.7         | -7.6         | $1.47 \cdot 10^{-6}$ | -4.0         | $7.58 \cdot 10^{-8}$ | -2.4         | $5.00 \cdot 10^{-9}$ |

For calculating the charge carrier density the following  $\epsilon$ -values were used:

**Table S4** Values used and obtained for the calculation of the charge carrier densities.

|           | $\epsilon$         | $n_{free}$           | $n_{free}$           | $n_{free}$           |
|-----------|--------------------|----------------------|----------------------|----------------------|
|           |                    | ITAO 1               | ITAO2                | ITAO3                |
| $In_2O_3$ | 8.9 <sup>1</sup>   | $2.95 \cdot 10^{16}$ | $2.24 \cdot 10^{16}$ | $2.01 \cdot 10^{16}$ |
| $SnO_2$   | 7.031 <sup>2</sup> | $3.74 \cdot 10^{16}$ | $2.84 \cdot 10^{16}$ | $2.54 \cdot 10^{16}$ |

With  $C_{ox} = 3.64 \cdot 10^{-8} \text{ F} \cdot \text{cm}^{-2}$  and  $T = 298 \text{ K}$ .

1. I. Hamberg and C. G. Granqvist, Evaporated Sn-doped  $In_2O_3$  films: Basic optical properties and applications to energy-efficient windows, *J. Appl. Phys.*, 1986, **60**, R123-R160.
2. M. A. Yildirim, S. T. Yildirim, E. F. Sakar and A. Ateş, Synthesis, characterization and dielectric properties of  $SnO_2$  thin films, *Spectrochim. Acta - A: Mol. Biomol. Spectrosc.*, 2014, **133**, 60–65.
